# Supplementary material
Source: publisher figshare collection journal article supplement (https://asha.figshare.com/articles/dataset/_/25937383)
Supplement: Supplementary file 1 [file 1]

**Supplemental Material S10.** Relationship roles questionnaire: worksheet visuals.

CHOOSE

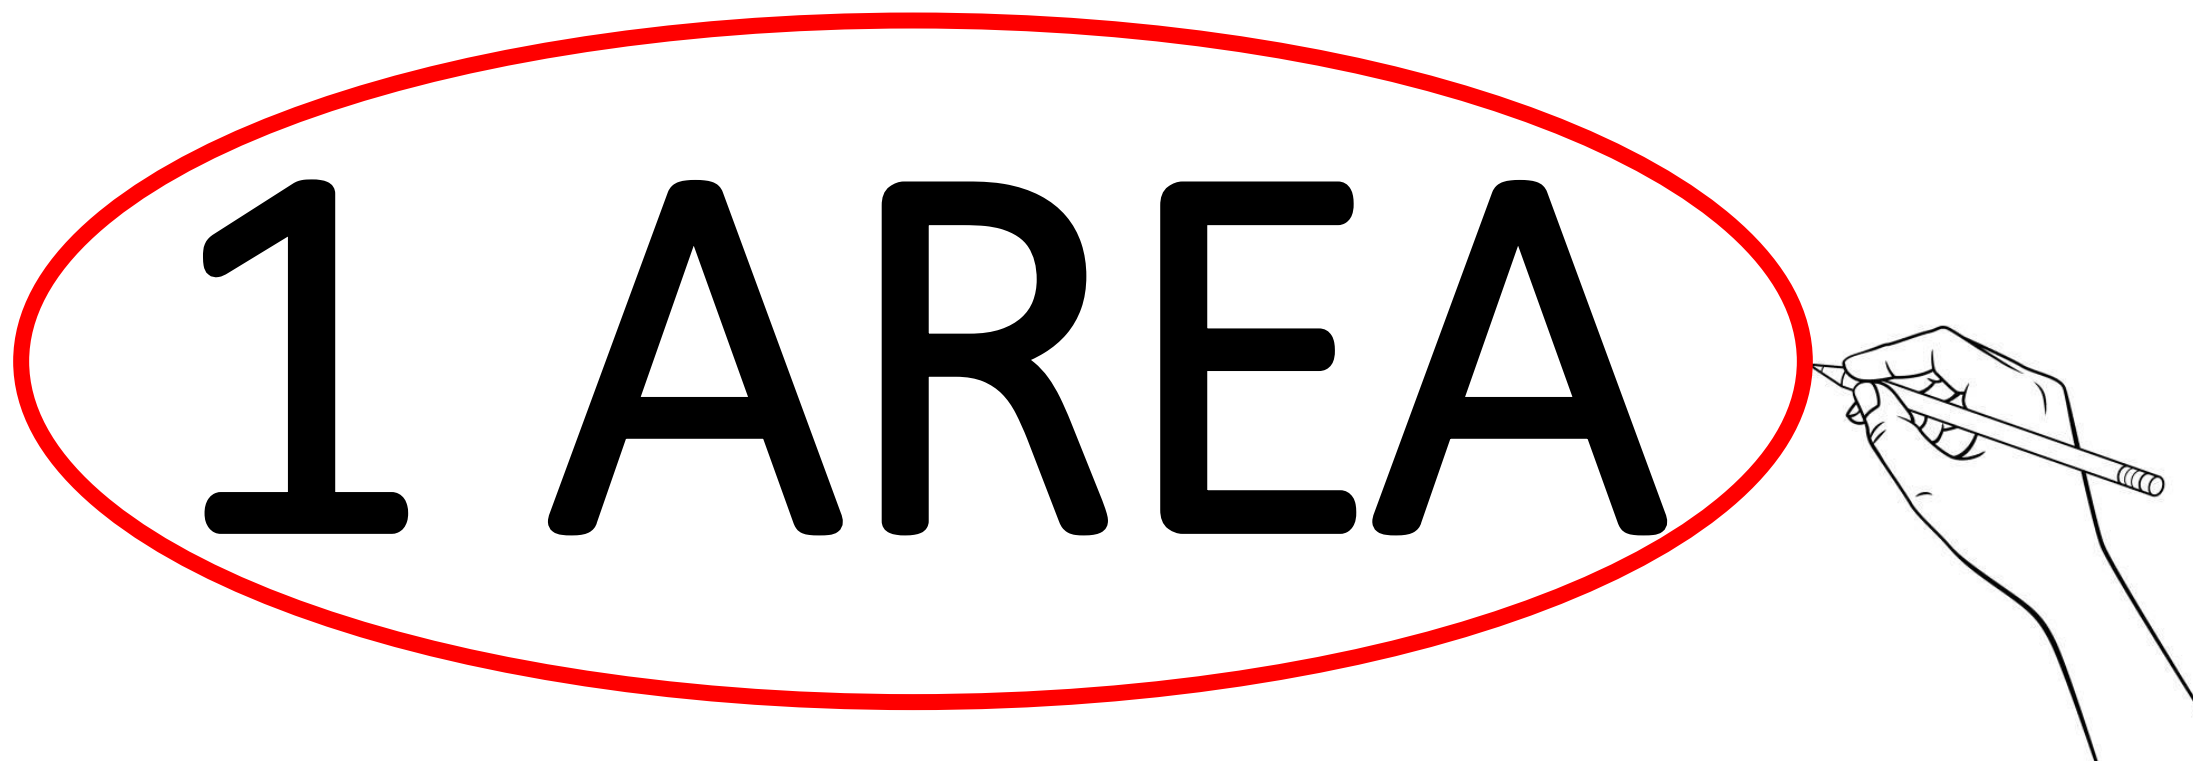

1 AREA

VALUE

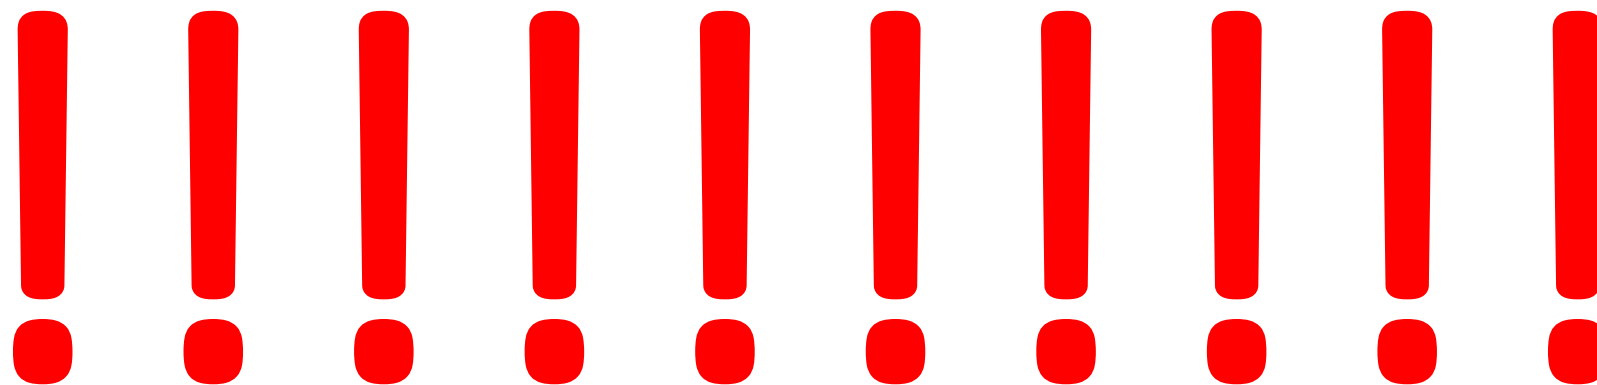

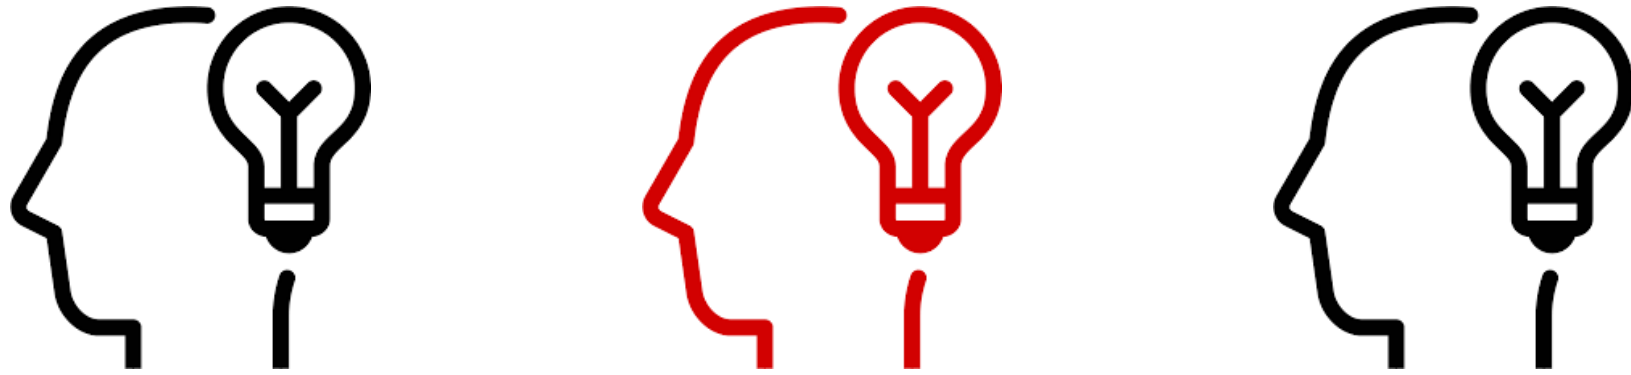

# BRAINSTORM SOLUTIONS

**GOAL**

The image features the word "GOAL" in a bold, black, sans-serif font. The letter "O" is replaced by a target symbol consisting of five concentric red circles on a white background. A solid black arrow points diagonally down and to the left, hitting the center bullseye of the target.

# SIGNS

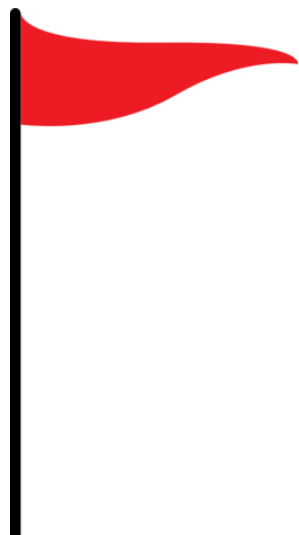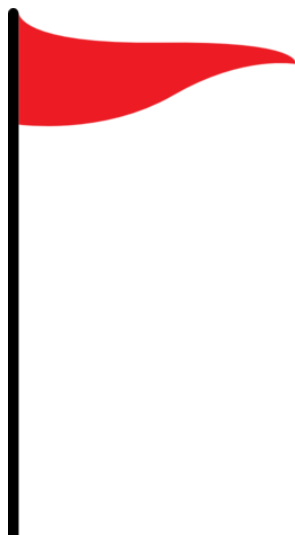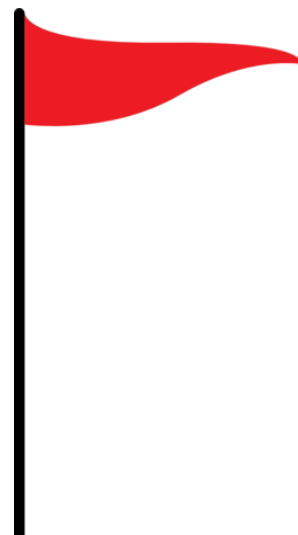

# COMMUNICATION PLAN

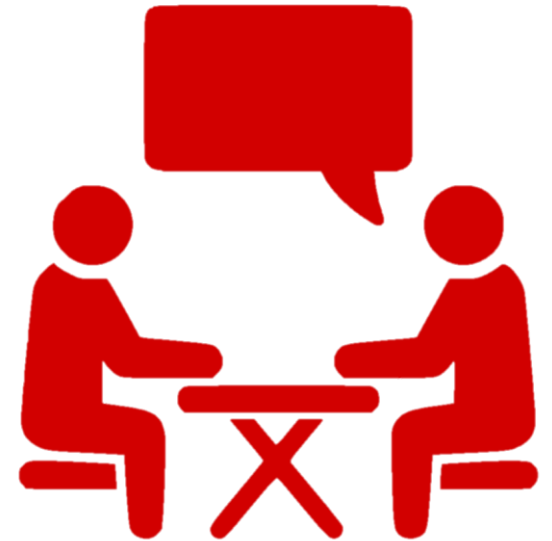

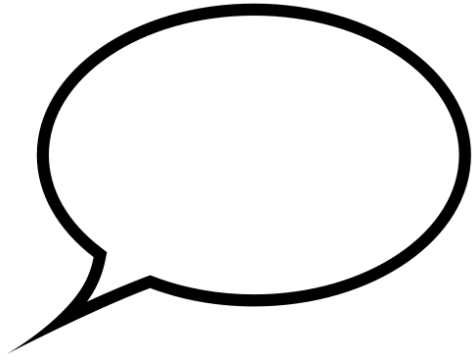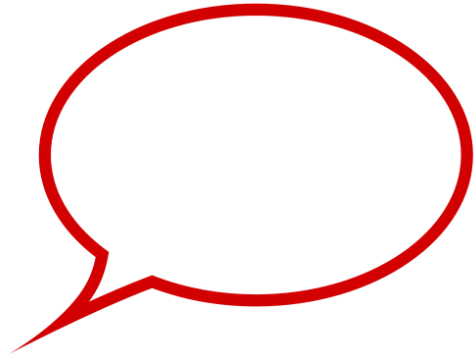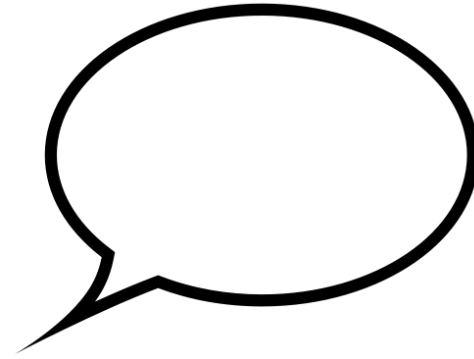

**STRATEGIES**
