# Supplementary material
Source: publisher figshare collection journal article supplement (https://asha.figshare.com/articles/dataset/_/25937383)
Supplement: Supplementary file 2 [file 1]

**Supplemental Material S7.** Relationship roles questionnaire: example of visual supports for response scales. Note that additional visual supports were provided that are not depicted here.

# CHANGE

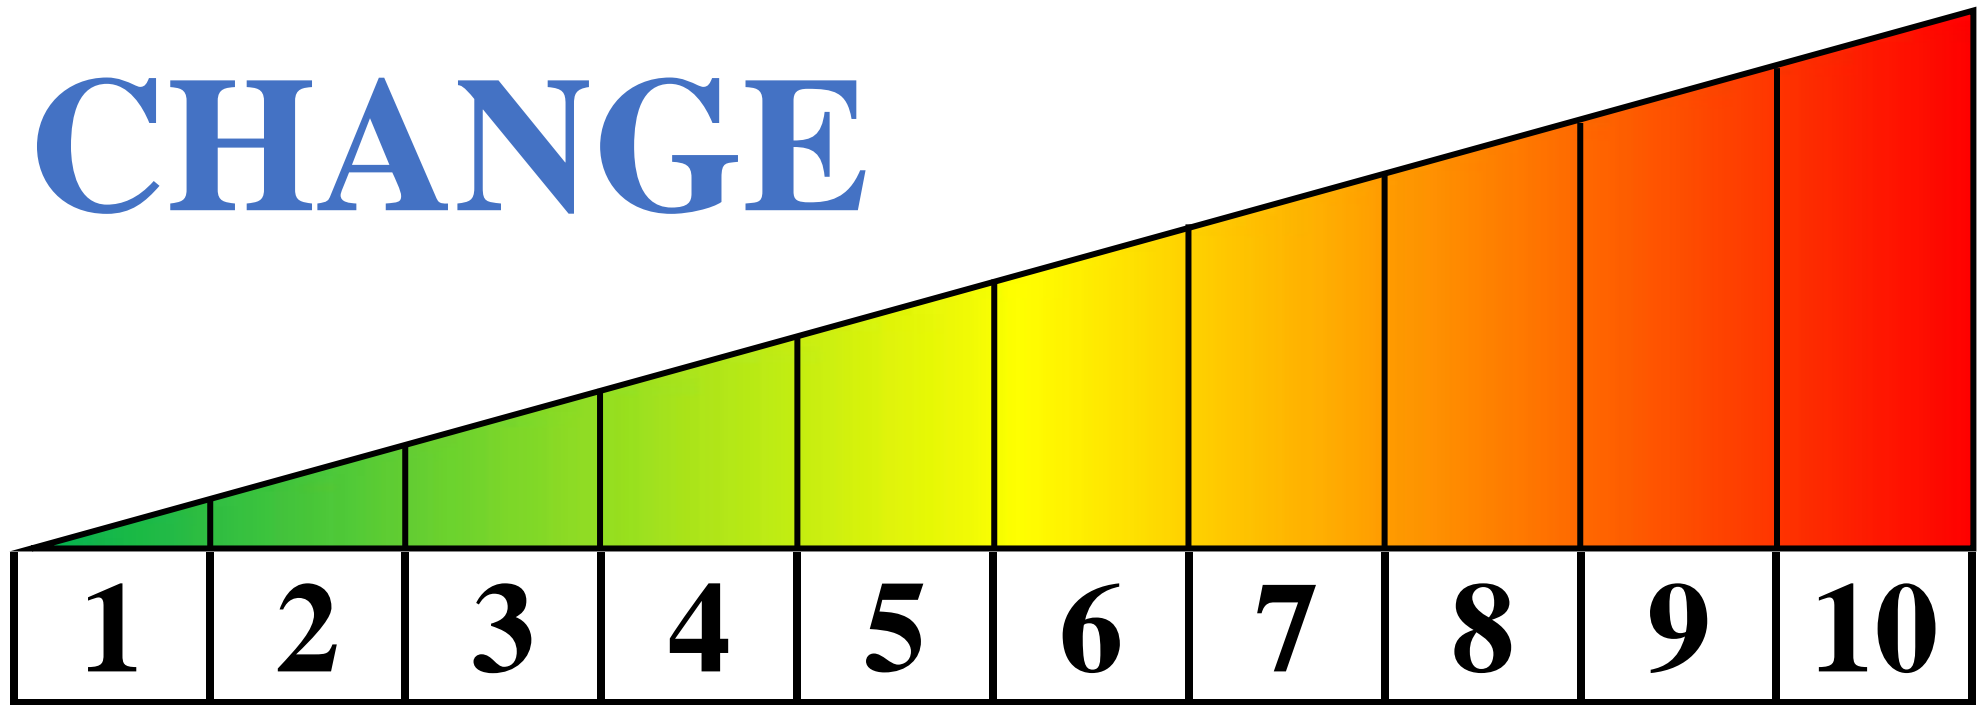

**No change**  **A lot of change**

Since the onset of your aphasia, how much have your **responsibilities** in this area **changed**?

# DISTRESS

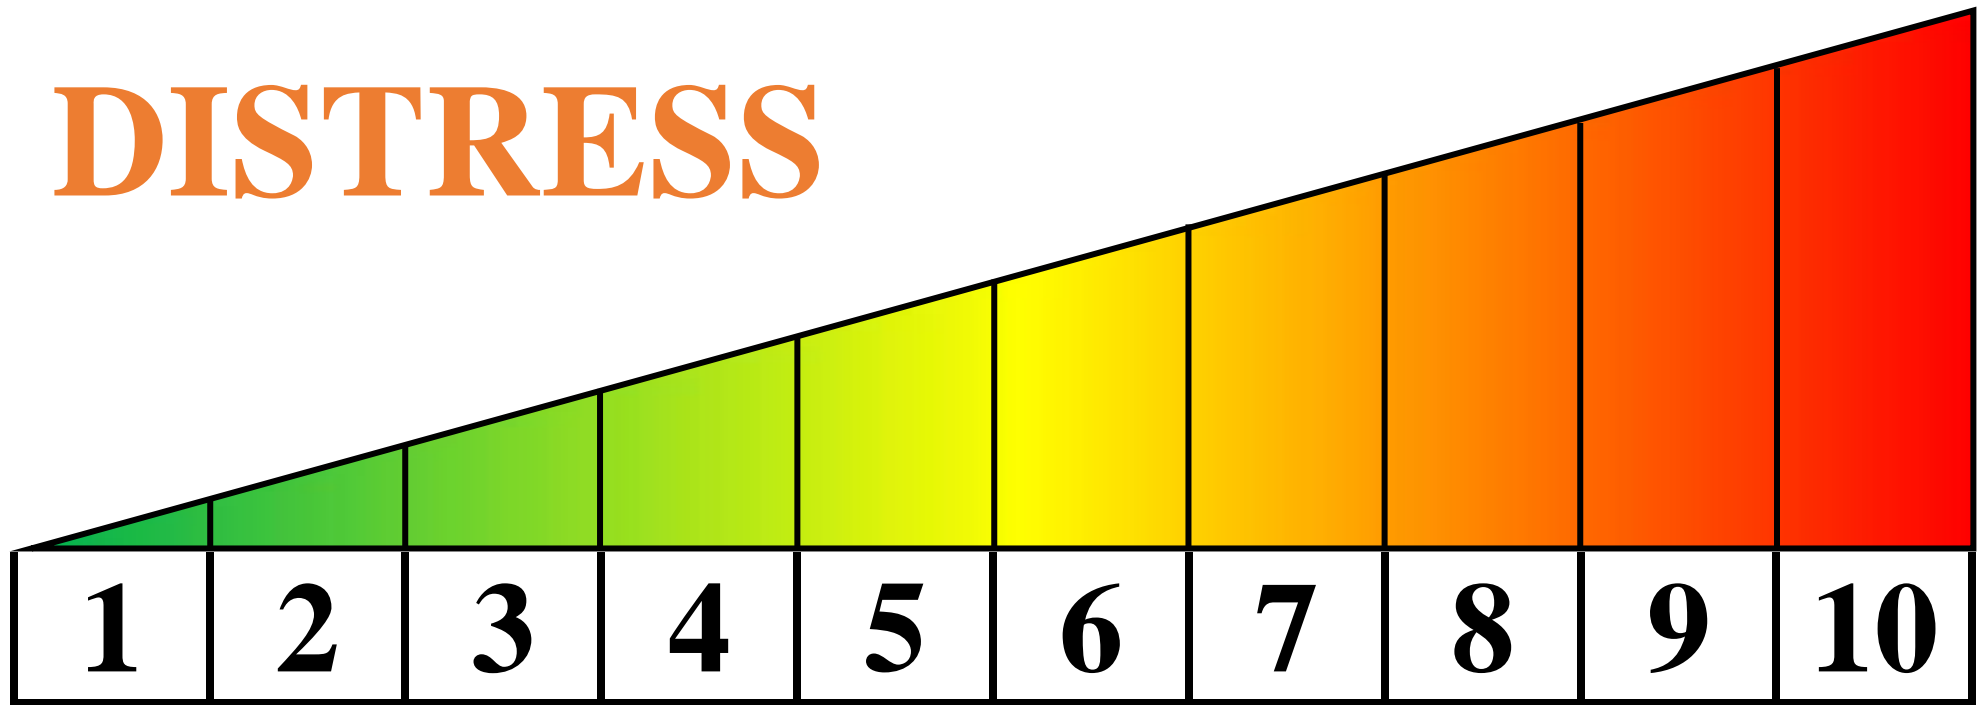

**Not Distressing** ← → **Very distressing**

How **distressing** has  
**distributing** responsibilities in  
this area been to you personally?

# IMPORTANCE

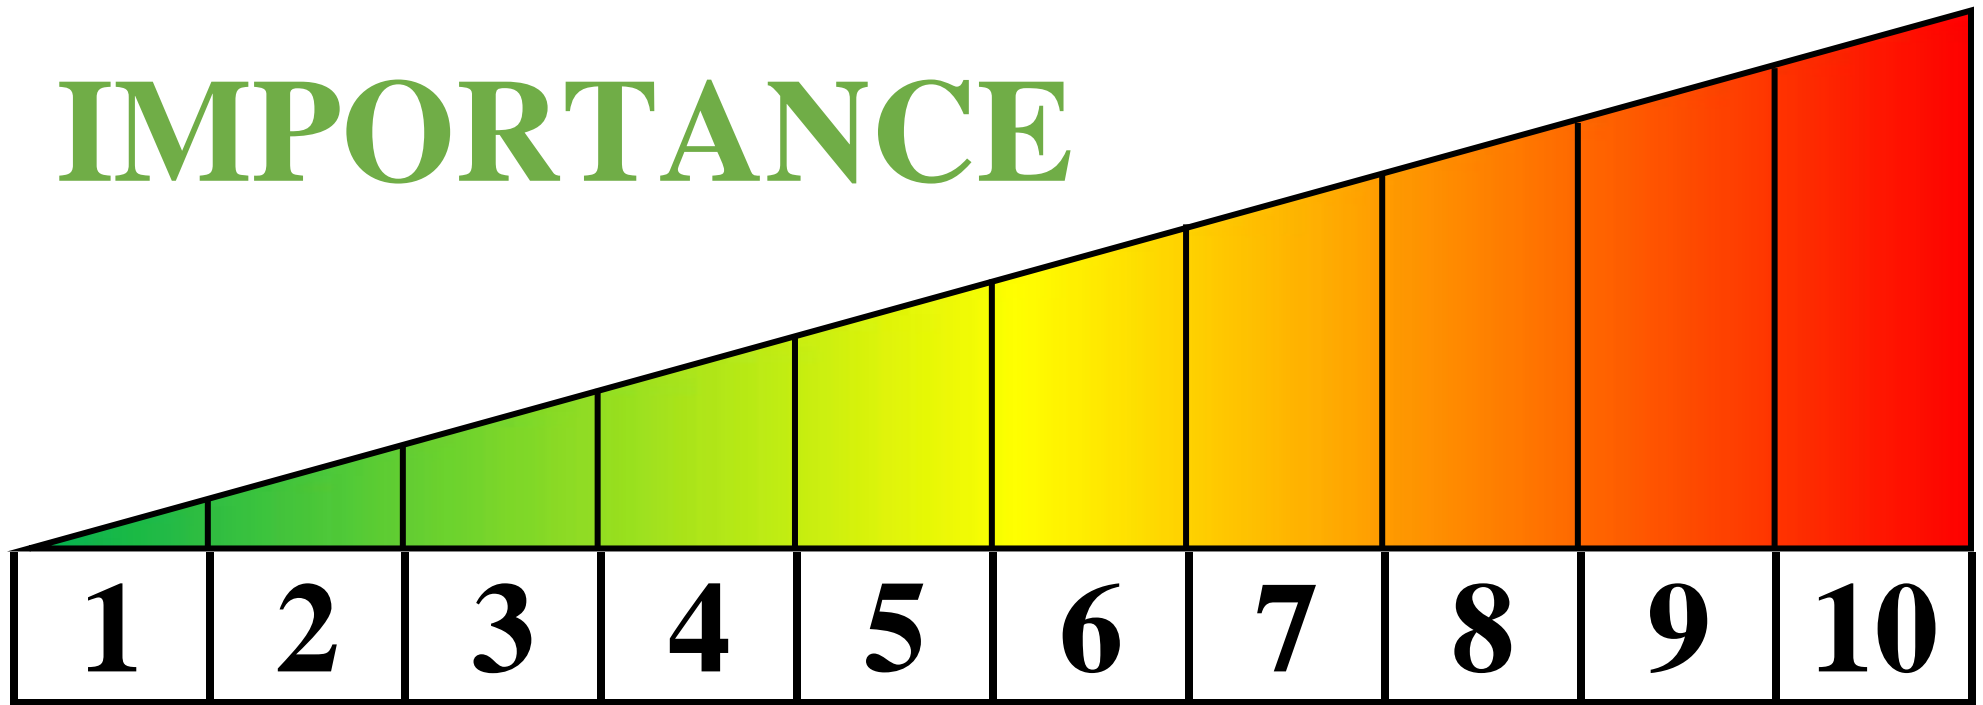

Not important ← → Very important

How **important** is it for you **to see change** in how you and your spouse divide responsibilities within this area?

# COMMUNICATION

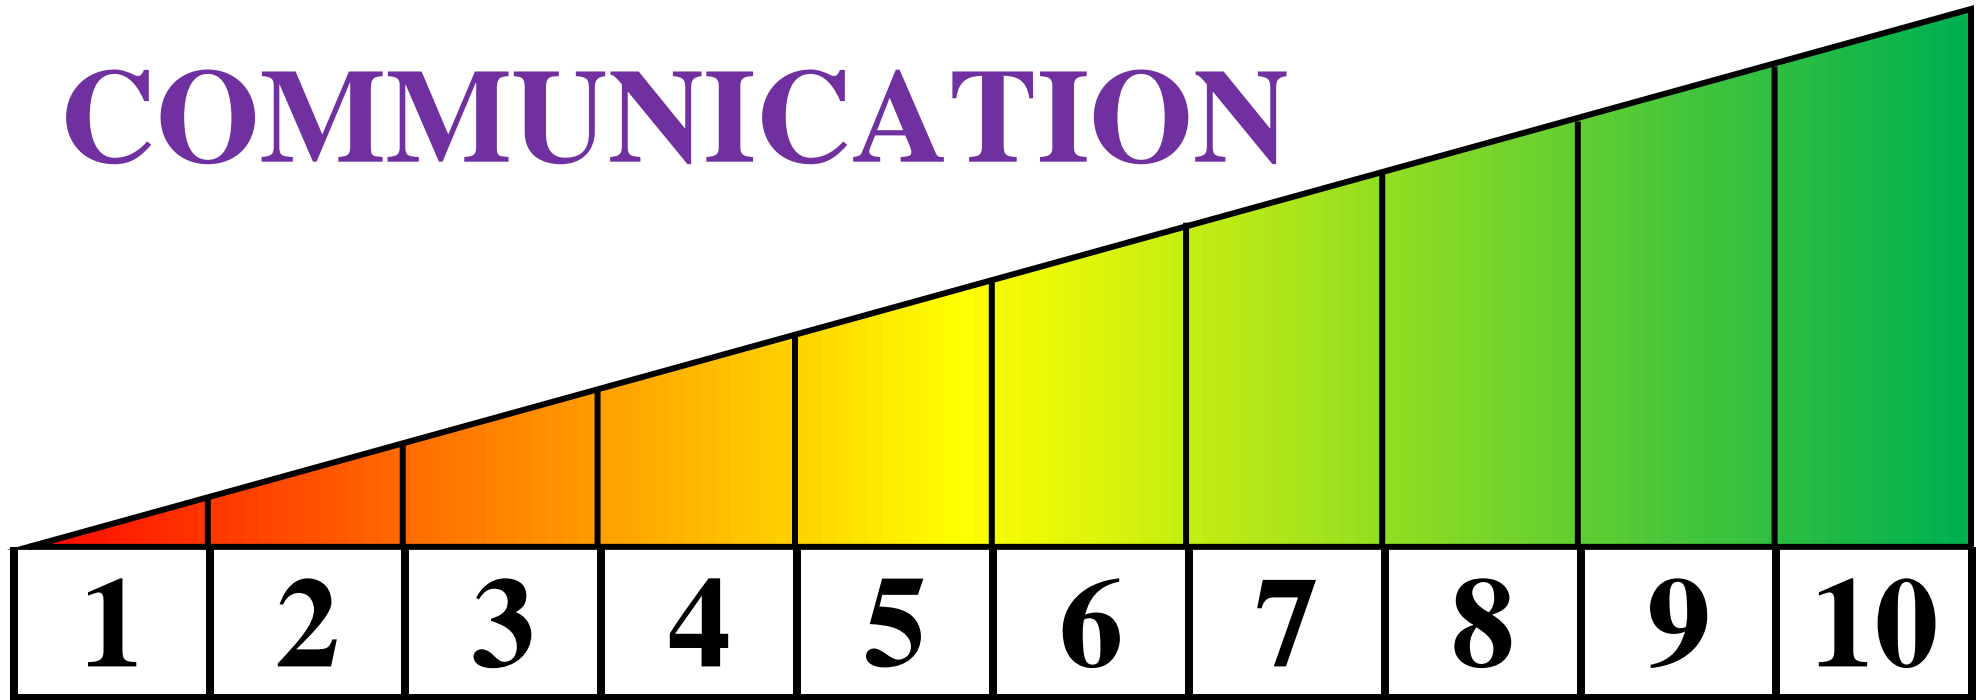

Poor quality ← → High quality

How would you rate the **quality** of your **communication** with your spouse about **roles and responsibilities**?
