# Supplementary material
Source: publisher figshare collection journal article supplement (https://asha.figshare.com/articles/dataset/_/25937383)
Supplement: Supplementary file 3 [file 1]

**Supplemental Material S6.** Relationship roles questionnaire: clinician form.

Participant ID #: \_\_\_\_\_

Date: \_\_\_\_\_

## RELATIONSHIP ROLES QUESTIONNAIRE (RRQ) – Clinician Form

**Clinician:** *Couples may share responsibilities in several areas. Please use the scale in front of you to choose a number between 1 and 10 to rate your level of change, distress, and importance for 6 different responsibility areas.*

### Questions for clinician reference:

**Change** – Since the onset of your aphasia, how much have your responsibilities in this area changed? (1: No change → 10: A lot of change)

**Distress** – How distressing has distributing responsibilities in this area been to you personally? (1: Not distressing → 10: Extremely distressing)

**Importance** – How important is it for you to see change in how you and your spouse divide responsibilities in this area? (1: Not important → 10: Very important)

| Responsibility Area                                                                                                                                      | Change | Distress | Importance |
|----------------------------------------------------------------------------------------------------------------------------------------------------------|--------|----------|------------|
| <b>HOUSEHOLD CHORES</b> – such as doing the laundry, cleaning the house, washing the dishes                                                              |        |          |            |
| <b>MEAL PREPARATION</b> – such as grocery shopping, cooking meals, meal planning                                                                         |        |          |            |
| <b>FINANCIAL MANAGEMENT</b> – such as paying bills, budgeting, financial planning                                                                        |        |          |            |
| <b>TRANSPORTATION &amp;/OR CHILD CARE</b> – such as driving to events & activities, pickup/drop-off from school or appointments, bedtime/wakeup routines |        |          |            |
| <b>MEDICAL &amp; LEGAL DECISIONS</b> – such as interactions with medical or legal professionals, scheduling hospital visits, insurance management        |        |          |            |
| <b>RELATIONSHIP &amp; INTIMACY</b> – such as coordinating dates, initiating personal discussions, initiating sex                                         |        |          |            |

**Clinician:** *Pick the area where you would most like to see change. Then, pick one more area.*

**Communication** – How would you rate the quality of your communication with your spouse about roles and responsibilities within your marriage on a scale of 1-10? (1: poor quality → 10: high quality)

Before aphasia onset:

After aphasia onset:
