# Supplementary material
Source: publisher figshare collection journal article supplement (https://asha.figshare.com/articles/dataset/_/25937383)
Supplement: Supplementary file 4 [file 1]

### **Supplemental Material S11.** Semi-Structured Interview Guide for Couples.

*“Thank you for agreeing to participate in this program and interview. We are very interested to receive your feedback about your experiences with relationship-centered communication partner training. We want to learn more about your perceptions of how this program was or was not helpful to your everyday life and communication with your spouse.”*

[Make sure to give people time to think before answering the questions and don't move too quickly. Move on when you feel you are starting to hear repetitive information.]

#### Questions:

1. Let's start by talking about your experiences over the past week with using the plan we created together in the last session.
  - a. Tell us about the experiences you had as you worked on your goal this past week.
    - i. Potential follow-up questions:
      1. What facilitated your progress towards your goal?
      2. What interfered with your progress towards your goal?
    - ii. Do you feel like you accomplished your goal this week? *Circle their response: YES / NO*
  - b. Please describe how you used your communication plan and strategies over the past week.
    - i. Potential follow-up questions:
      1. What were some facilitators to using your plan and strategies?
      2. What were some barriers to using your plan and strategies?

2. Next, I would like to hear about some of your impressions regarding the relationship-centered communication partner training program (i.e., session with the clinician, the RRQ, the RRQ worksheet, and homework)
  - a. What did you like about the program?
  - b. What would you change about the program?
  - c. Please describe what impact, if any, this program had on your communication as a couple.
  - d. Please describe what impact, if any, this program had on your relationship.
  - e. Is there anything else you think researchers and clinicians could consider in the development of this program?
  - f. If this program, with continued follow-up and support, were a part of your rehabilitation experience, would you find it helpful? *Circle their response: YES / NO*

*“That concludes our interview. Thank you so much for sharing your thoughts and opinions. If you have additional information that you did not get to share, please feel free to contact Dr. Tyson Harmon”*
