# Supplementary material
Source: publisher figshare collection journal article supplement (https://asha.figshare.com/articles/dataset/_/25937383)
Supplement: Supplementary file 5 [file 1]

## **Supplemental Material S2. Communication Partner Training Module.**

The Communication Partner Training Module can be accessed at the following link:

[https://docs.google.com/presentation/d/1x\\_am2WXHYb3KFRVEo2w2IBIU48xlfvJgiEQHhNHXHA8/edit?usp=sharing](https://docs.google.com/presentation/d/1x_am2WXHYb3KFRVEo2w2IBIU48xlfvJgiEQHhNHXHA8/edit?usp=sharing)

This is a dynamic Google Slide deck that integrates hyperlinks for navigation and free video resources from Aphasia Access ([aphasiaaccess.org](https://aphasiaaccess.org)). Two research assistants (Chloe Schelly and Emma Loudin) from the Harmon Emotion, Attention, and Aphasia (HEAAL) Lab developed this module with oversight provided by the first two authors of the study. The module was based on principles from supported conversation for adults with aphasia (Kagan, 1998; Kagan et al., 2001; Simmons-Mackie & Kagan, 1999).

Clinicians and researchers are welcome to use this resource with attribution.
