# Supplementary material
Source: publisher figshare collection journal article supplement (https://asha.figshare.com/articles/dataset/_/25937383)
Supplement: Supplementary file 7 [file 1]

**Supplemental Material S8.** Relationship roles questionnaire: partner form.

Participant ID #: \_\_\_\_\_

Date: \_\_\_\_\_

## RELATIONSHIP ROLES QUESTIONNAIRE (RRQ) – Partner/Spouse Form

Couples may share responsibilities in the bolded areas below. For each **Responsibility Area**, answer the following questions on the scales provided:

**1. Change** – Since the onset of your spouse’s aphasia, how much have your responsibilities in this area changed?

**2. Distress** – How distressing has distributing responsibilities in this area been to you personally?

**3. Importance** – How important is it for you to see change in how you and your spouse divide responsibilities in this area?

**HOUSEHOLD CHORES** – such as doing the laundry, cleaning the house, washing the dishes

|                                          |   |   |   |   |   |   |   |   |   |    |                                           |
|------------------------------------------|---|---|---|---|---|---|---|---|---|----|-------------------------------------------|
| <b>No change in this area</b>            | 1 | 2 | 3 | 4 | 5 | 6 | 7 | 8 | 9 | 10 | <b>A lot of change in this area</b>       |
| <b>No distress in this area</b>          | 1 | 2 | 3 | 4 | 5 | 6 | 7 | 8 | 9 | 10 | <b>Extreme distress in this area</b>      |
| <b>Not important to change this area</b> | 1 | 2 | 3 | 4 | 5 | 6 | 7 | 8 | 9 | 10 | <b>Very important to change this area</b> |

**MEAL PREPARATION** – such as grocery shopping, cooking meals, meal planning

|                                          |   |   |   |   |   |   |   |   |   |    |                                           |
|------------------------------------------|---|---|---|---|---|---|---|---|---|----|-------------------------------------------|
| <b>No change in this area</b>            | 1 | 2 | 3 | 4 | 5 | 6 | 7 | 8 | 9 | 10 | <b>A lot of change in this area</b>       |
| <b>No distress in this area</b>          | 1 | 2 | 3 | 4 | 5 | 6 | 7 | 8 | 9 | 10 | <b>Extreme distress in this area</b>      |
| <b>Not important to change this area</b> | 1 | 2 | 3 | 4 | 5 | 6 | 7 | 8 | 9 | 10 | <b>Very important to change this area</b> |

**FINANCIAL MANAGEMENT** – such as paying bills, budgeting, financial planning

|                                          |   |   |   |   |   |   |   |   |   |    |                                           |
|------------------------------------------|---|---|---|---|---|---|---|---|---|----|-------------------------------------------|
| <b>No change in this area</b>            | 1 | 2 | 3 | 4 | 5 | 6 | 7 | 8 | 9 | 10 | <b>A lot of change in this area</b>       |
| <b>No distress in this area</b>          | 1 | 2 | 3 | 4 | 5 | 6 | 7 | 8 | 9 | 10 | <b>Extreme distress in this area</b>      |
| <b>Not important to change this area</b> | 1 | 2 | 3 | 4 | 5 | 6 | 7 | 8 | 9 | 10 | <b>Very important to change this area</b> |

**TRANSPORTATION &/OR CHILD CARE** – such as driving to events and activities, pickup and drop-off from school or appointments, bedtime/wakeup routines

|                                          |   |   |   |   |   |   |   |   |   |    |                                           |
|------------------------------------------|---|---|---|---|---|---|---|---|---|----|-------------------------------------------|
| <b>No change in this area</b>            | 1 | 2 | 3 | 4 | 5 | 6 | 7 | 8 | 9 | 10 | <b>A lot of change in this area</b>       |
| <b>No distress in this area</b>          | 1 | 2 | 3 | 4 | 5 | 6 | 7 | 8 | 9 | 10 | <b>Extreme distress in this area</b>      |
| <b>Not important to change this area</b> | 1 | 2 | 3 | 4 | 5 | 6 | 7 | 8 | 9 | 10 | <b>Very important to change this area</b> |

**MEDICAL & LEGAL DECISIONS** – such as interactions with medical or legal professionals, scheduling hospital visits, insurance management

|                                          |   |   |   |   |   |   |   |   |   |    |                                           |
|------------------------------------------|---|---|---|---|---|---|---|---|---|----|-------------------------------------------|
| <b>No change in this area</b>            | 1 | 2 | 3 | 4 | 5 | 6 | 7 | 8 | 9 | 10 | <b>A lot of change in this area</b>       |
| <b>No distress in this area</b>          | 1 | 2 | 3 | 4 | 5 | 6 | 7 | 8 | 9 | 10 | <b>Extreme distress in this area</b>      |
| <b>Not important to change this area</b> | 1 | 2 | 3 | 4 | 5 | 6 | 7 | 8 | 9 | 10 | <b>Very important to change this area</b> |

**RELATIONSHIP & INTIMACY** – such as coordinating dates, initiating personal discussions, initiating sex

|                                          |   |   |   |   |   |   |   |   |   |    |                                           |
|------------------------------------------|---|---|---|---|---|---|---|---|---|----|-------------------------------------------|
| <b>No change in this area</b>            | 1 | 2 | 3 | 4 | 5 | 6 | 7 | 8 | 9 | 10 | <b>A lot of change in this area</b>       |
| <b>No distress in this area</b>          | 1 | 2 | 3 | 4 | 5 | 6 | 7 | 8 | 9 | 10 | <b>Extreme distress in this area</b>      |
| <b>Not important to change this area</b> | 1 | 2 | 3 | 4 | 5 | 6 | 7 | 8 | 9 | 10 | <b>Very important to change this area</b> |

| Responsibility Area            | Change | Distress | Importance |
|--------------------------------|--------|----------|------------|
| HOUSEHOLD CHORES               |        |          |            |
| MEAL PREPARATION               |        |          |            |
| FINANCIAL MANAGEMENT           |        |          |            |
| TRANSPORTATION &/OR CHILD CARE |        |          |            |
| MEDICAL & LEGAL DECISIONS      |        |          |            |
| RELATIONSHIP & INTIMACY        |        |          |            |

Circle the two areas above where you would most like to see change.

**Communication** – How would you rate the quality of your communication with your spouse about roles and responsibilities within your marriage on a scale of 1-10?

Before aphasia onset:

|                     |   |   |   |   |   |   |   |   |   |    |                     |
|---------------------|---|---|---|---|---|---|---|---|---|----|---------------------|
| <b>Poor Quality</b> | 1 | 2 | 3 | 4 | 5 | 6 | 7 | 8 | 9 | 10 | <b>High Quality</b> |
|---------------------|---|---|---|---|---|---|---|---|---|----|---------------------|

After aphasia onset:

|                     |   |   |   |   |   |   |   |   |   |    |                     |
|---------------------|---|---|---|---|---|---|---|---|---|----|---------------------|
| <b>Poor Quality</b> | 1 | 2 | 3 | 4 | 5 | 6 | 7 | 8 | 9 | 10 | <b>High Quality</b> |
|---------------------|---|---|---|---|---|---|---|---|---|----|---------------------|
