# Supplementary material
Source: publisher figshare collection journal article supplement (https://asha.figshare.com/articles/dataset/_/25937383)
Supplement: Supplementary file 9 [file 1]

**Supplemental Material S3.** Communication partner training module worksheet.

## **Adjusting language**

- Simplified language used
- Repeat
- Paraphrase

## **Writing/graphics**

- Write keywords
- yes/no questions
- Point to illustrations
- Photos

## **Gestures/body language**

- Eye contact
- Posture
- Facial expression
- Gesture

## **Verifying understanding**

- Validate
- Check for Understanding
- Glossing

---

Please circle a few strategies we discussed today that you would like to continue working on.

Please write a specific goal to work on before the next session:

---

---
