# Supplementary material
Source: publisher figshare collection journal article supplement (https://asha.figshare.com/articles/dataset/_/25937383)

**Supplemental Material S5.** Relationship-centered communication partner training protocol visuals.

**PURPOSE:**

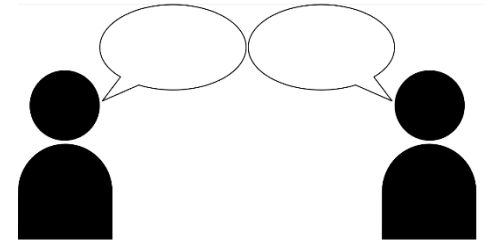

**Learn** to and **practice**  
**conversing** together as  
partners in the context of  
**roles & responsibilities**  
in **marriage**.

## OBJECTIVE 1:

Have a **collaborative**  
**discussion** about  
 **roles and**  
**responsibilities.**

## OBJECTIVE 2:

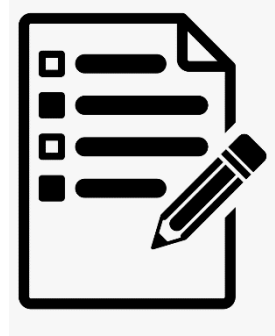

Set **goals** and  
make **plans**  
for the **week**.

**OBJECTIVE 3:**

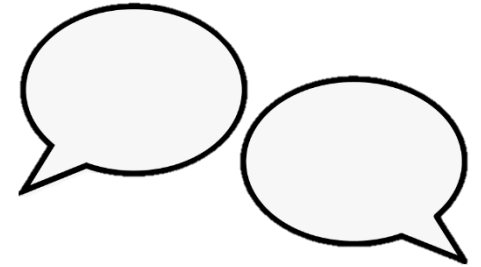

**Practice  
communication  
strategies.**

## EXPECTATION 1:

This is a **safe**

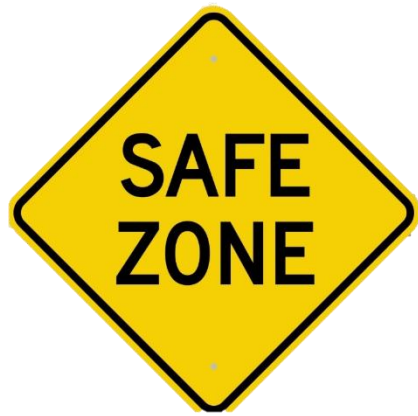

**space** for  
communication.

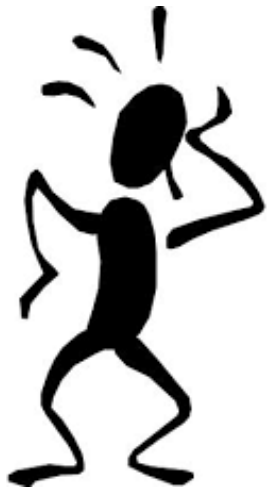

## EXPECTATION 2:

This session and  
your plans may **not**  
**go smoothly** and  
**that's okay.**

## EXPECTATION 3:

I am here to support  
your **communication**  
and **adjustment to**  
**life with aphasia.**

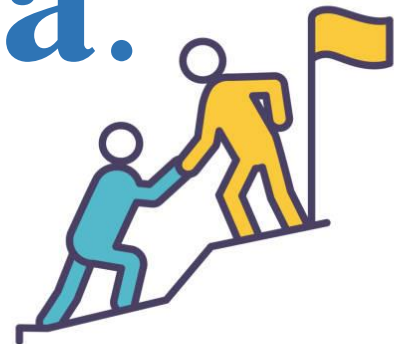

Supplement: Supplementary file 10 [file 1]
