# Supplementary material
Source: publisher figshare collection journal article supplement (https://asha.figshare.com/articles/dataset/_/25937383)
Supplement: Supplementary file 11 [file 1]

**Supplemental Material S9.** Relationship roles questionnaire: worksheet.

Participant ID #s: \_\_\_\_\_

Date: \_\_\_\_\_

## **RELATIONSHIP ROLES QUESTIONNAIRE (RRQ) – WORKSHEET**

**Negotiate an area you would both like to focus on as a couple:**

- What is impacting your relationship and home the most right now?
- In which area is it most important for both of you to see change?

**Discuss what you value about this area:**

- Why is it important to you and your family to see improvement in this area?
- What would be an ideal outcome?

**Brainstorm possible solutions to seek improvement in this area:**

**Write down a specific goal for improvement in this area – what would it look like?**

**What would be signs that the plan is not going smoothly; and we need to discuss tweaks to our plan?**

- What would be signs that things are not going according to plan?
- What would you feel or notice that suggests you need more help?
- What might be something you notice suggesting your spouse needs more help?

**Communication Plan: What is the best way to approach one another?**

**Communication strategies:**
